# Supplementary material
Source: PubMed Central journal article supplement (PMC1150882)
Supplement: 7600687s1.pdf [file 7600687s1.pdf]

**SUPPLEMENTAL TABLE 1 - Yeast strains used in this paper**

| Strain      | Genotype                                                                                                                                                                                      | Source      |
|-------------|-----------------------------------------------------------------------------------------------------------------------------------------------------------------------------------------------|-------------|
| YSB1768     | Mata, <i>his4-912</i> Δ, <i>lys2-128</i> Δ, <i>leu2</i> Δ1, <i>CTR9-MYC9::KANMX</i> , <i>gal10</i> Δ56                                                                                        | This study  |
| YSB1774     | Mata, <i>his4-912</i> Δ, <i>lys2-128</i> Δ, <i>leu2</i> Δ1, <i>trp1</i> Δ63, <i>ura3-52</i> , <i>CTR9-MYC9::KANMX</i> , <i>gal10</i> Δ56                                                      | This study  |
| YSB1775     | Mata, <i>his4-912</i> Δ, <i>lys2-128</i> Δ, <i>leu2</i> Δ1, <i>trp1</i> Δ63, <i>ura3-52</i> , <i>CTR9-MYC9::KANMX</i> , <i>RPB3-HA::LEU2</i> , <i>spt4</i> Δ:: <i>URA3</i> , <i>gal10</i> Δ56 | This study  |
| YSB1776     | Mata, <i>his4-912</i> Δ, <i>lys2-128</i> Δ, <i>leu2</i> Δ1, <i>CTR9-MYC9::KANMX</i> , <i>gal10</i> Δ56, <i>SPT6-FLAG</i> , <i>npl3-120</i>                                                    | This study  |
| YSB1777     | Mata, <i>his4-912</i> Δ, <i>lys2-128</i> Δ, <i>leu2</i> Δ1, <i>ura3-52</i> , <i>RPB3-HA::LEU2</i> , <i>CTR9-MYC9::KANMX</i> , <i>SPT6-FLAG</i> , <i>gal10</i> Δ56, <i>npl3-120</i>            | This study  |
| YSB1769     | Mata, <i>his4-912</i> Δ, <i>lys2-128</i> Δ, <i>leu2</i> Δ1, <i>CTR9-MYC9::KANMX</i> , <i>gal10</i> Δ56, <i>npl3-40</i>                                                                        | This study  |
| YSB1799     | Mata, <i>his4-912</i> Δ, <i>lys2-128</i> Δ, <i>leu2</i> Δ1, <i>ura3-52</i> , <i>SPT6-FLAG</i>                                                                                                 | This study  |
| YSB1800     | Mata, <i>his4-912</i> Δ, <i>lys2-128</i> Δ, <i>leu2</i> Δ1, <i>ura3-52</i> , <i>CTR9-MYC9::KANMX</i> , <i>npl3-120</i>                                                                        | This study  |
| YSB1770     | Mata, <i>his4-912</i> Δ, <i>lys2-128</i> Δ, <i>leu2</i> Δ1, <i>CTR9-MYC9::KANMX</i> , <i>gal10</i> Δ56, <i>spt6-401</i>                                                                       | This study  |
| YSB1772     | Mata, <i>his4-912</i> Δ, <i>lys2-128</i> Δ, <i>leu2</i> Δ1, <i>CTR9-MYC9::KANMX</i> , <i>gal10</i> Δ56, <i>spt4-301</i>                                                                       | This study  |
| YSB1771     | Mata, <i>his4-912</i> Δ, <i>lys2-128</i> Δ, <i>leu2</i> Δ1, <i>CTR9-MYC9::KANMX</i> , <i>gal10</i> Δ56, <i>npl3-210</i>                                                                       | This study  |
| YSB1778     | Mata, <i>his4-912</i> Δ, <i>lys2-128</i> Δ, <i>leu2</i> Δ1, <i>ura3-52</i> , <i>SPT6-FLAG</i> , <i>CTR9-MYC9::KANMX</i> , <i>gal10</i> Δ56                                                    | This study  |
| YSB1779     | Mata, <i>his4-912</i> Δ, <i>lys2-128</i> Δ, <i>ura3-52</i> , <i>trp1</i> Δ63, <i>spt4-289</i> , <i>CTR9-MYC9::KANMX</i>                                                                       | This study  |
| YSB1780     | Mata, <i>his4-912</i> Δ, <i>lys2-128</i> Δ, <i>ura3-52</i> , <i>spt4-289</i> , <i>leu2</i> Δ1, <i>RPB3-HA::LEU2</i> , <i>gal10</i> Δ56                                                        | This study  |
| YSB1781     | Mata, <i>his4-912</i> Δ, <i>lys2-128</i> Δ, <i>ura3-52</i> , <i>trp1</i> Δ63, <i>RPB3-HA::LEU2</i> , <i>SPT6-FLAG</i>                                                                         | This study  |
| FY268       | Mata, <i>his4-912</i> Δ, <i>lys2-128</i> Δ, <i>leu2</i> Δ                                                                                                                                     | F. Winston  |
| FY775       | Mata, <i>his4-912</i> Δ, <i>lys2-128</i> Δ, <i>leu2</i> Δ1, <i>ura3-52</i>                                                                                                                    | F. Winston  |
| FY228       | Mata, <i>his4-912</i> Δ, <i>lys2-128</i> Δ, <i>trp1</i> Δ63, <i>ura3-52</i> , <i>spt4-289</i>                                                                                                 | F. Winston  |
| FY233       | Mata, <i>his4-912</i> Δ, <i>lys2-128</i> Δ, <i>trp1</i> Δ63, <i>ura3-52</i> , <i>spt4-6</i>                                                                                                   | F. Winston  |
| FY241       | Mata, <i>his4-912</i> Δ, <i>lys2-128</i> Δ, <i>trp1</i> Δ63, <i>ura3-52</i> , <i>spt4-3</i>                                                                                                   | F. Winston  |
| FY426       | Mata, <i>his4-912</i> Δ, <i>lys2-128</i> Δ, <i>trp1</i> Δ63, <i>ura3-52</i> , <i>leu2</i> Δ1, <i>spt4</i> Δ:: <i>URA3</i>                                                                     | F. Winston  |
| Δ55(CKY185) | Mata, <i>his4-912</i> Δ, <i>lys2-128</i> Δ, <i>leu2</i> Δ1, <i>ura3-52</i> , <i>RPB3-HA::LEU2</i> , <i>CTR9-MYC9::KANMX</i> , <i>SPT6-FLAG</i> , <i>gal10</i> Δ56                             | F. Winston  |
| CKY122      | Mata, <i>his4-912</i> Δ, <i>lys2-128</i> Δ, <i>leu2</i> Δ1, <i>CTR9-MYC9::KANMX</i> , <i>RPB3-HA::LEU2</i> , <i>spt6Hhh</i>                                                                   | F. Winston  |
| YDR432W     | Mata, <i>his3</i> Δ1, <i>leu2</i> Δ0, <i>met15</i> Δ0, <i>ura3</i> Δ0, <i>npl3</i> Δ:: <i>KANMX</i>                                                                                           | Res. Genet. |
