# Supplementary material
Source: PubMed Central journal article supplement (PMC1150882)
Supplement: 7600687s2.pdf [file 7600687s2.pdf]

**SUPPLEMENTAL TABLE 2 – ChIP primers used**

| <b>Primer #</b> | <b>Location</b>                | <b>Primer Sequence</b>                                            |
|-----------------|--------------------------------|-------------------------------------------------------------------|
| ADH1 #1         | Prom, - 235<br>Prom, -18       | TTCCTTCCTTCATTCACGCACACT<br>GTTGATTGTATGCTTGGTATAGCTTG            |
| ADH1 #2         | ORF, +146<br>ORF, +372         | ACGCTTGGCACGGTGACTG<br>ACCGTCGTGGGTGTAACCAGA                      |
| ADH1 #3         | ORF, +844<br>ORF, +1013        | TTCAACCAAGTCGTCAAGTCCATCTCTA<br>ATTTGACCCTTTTCCATCTTTTCGTAA       |
| ADH1 #4         | 3' UTR, +1231<br>3' UTR, +1400 | ACCGGCATGCCGAGCAAATGCCTG<br>CCCAACTGAAGGCTAGGCTGTGG               |
| GAL1 #1         | 3' UTR, +1764<br>3' UTR, +2079 | CCACAACTTTAAAACACAGGGAC<br>CCTCCTCGCGCTTGTCTACTAAAATC             |
| GAL1 #2         | ORF, +1039<br>ORF, +1331       | GAAGAGTCTCTCGCCAATAAGAAACAGG<br>GAACATTCGTAAAGTTTATCGCAAG         |
| GAL1 #3         | ORF, +427<br>ORF, +726         | CCGGAAAGGTTTGCCAGTGCTC<br>CGGAGTAGCCTTCAACTGCGGTTTG               |
| GAL1 #4         | Prom, -190<br>Prom, +54        | GGTAATTAATCAGCGAAGCGATG<br>TGCGCTAGAATTGAACTCAGGTAC               |
| GAL10 #5        | Prom, -58<br>ORF, +182         | TTAAACTTCTTTGCGTCCATCC<br>TGCTTGGTCAAGACCTCTAACC                  |
| GAL10 #6        | ORF, +823<br>ORF, +1108        | TGTCGTGAGTGGAACCTGGGTT<br>GCATATCTTCAGCGGAAAATCTGGC               |
| GAL10 #7        | ORF, +1869<br>3' UTR, +2078    | TGTCAAGGCTTTTCATCCCGATTC<br>TTGGACCCGTAAGTTTCACCGT                |
| GAL10 #8        | 3' UTR, +2102<br>3' UTR, +2356 | TTGCCAGCTTACTATCCTTCTT<br>CGGCTCGTGCTATATTCTTGT                   |
| GAL10 #9        | 3' UTR, +2323<br>3' UTR, +2604 | ATGGACGGTAGCAACAAGAATA<br>TGGGTTAAGGAAAATGACAGAA                  |
| GAL7 #10        | Prom, -203<br>ORF, +38         | CAAAAAGCGCTCGGACAACT<br>TGGGAATGGCTAGAAAAATCAA                    |
| GAL7 #11        | ORF, +361<br>ORF, +655         | AGCCCAATCATAATCTAACCAT<br>TGACGTAATCGGCAAACAAAT                   |
| GAL7 #12        | ORF, +813<br>ChrIX, +1019      | CGCCTCGATTTTAAAGCAACTA<br>CCTAACAATTCAAACCAACCA                   |
| PYK1 #1         | Prom, -288<br>Prom, +19        | CATATGATGCTAGGTACCTTTAGTGTCTTC<br>CAATCTTTCTAATCTAGACATTGTGATGATG |
| PYK1 #2         | ORF, +508<br>ORF, +799         | GGTAAGATCTGTTCCACAAGGGTG<br>CAAGTCACCTCTGGCAACCATAACAC            |

|         |                                |                                                               |
|---------|--------------------------------|---------------------------------------------------------------|
| PYK1 #3 | ORF, +1104<br>ORF, +1372       | GAAACTGTACTCCAAAGCCAACCTCC<br>GGGCTTCAACATCATCAGTCCAGTC       |
| PYK1 #4 | 3' UTR, +1470<br>3' UTR, +1720 | CTCCAACACTTTGCAAGTCTCTACCG<br>GTTTCCAAAAATGCAACACCTCATCG      |
| PYK1 #5 | 3' UTR, +1695<br>3' UTR, +1995 | CGATGAGGTGTTGCATTTTTGGAAAC<br>GACACTAATTGAATCTGCCCGCGTC       |
| PMA1 #1 | ORF, +168<br>ORF, +376         | CGACGACGAAGACAGTGATAACG<br>ATTGAATTGGACCGACGAAAAACATAAC       |
| PMA1 #2 | ORF, +1010<br>ORF, +1235       | GTTTGCCAGCTGTCGTTACCACCAC<br>GCAGCCAAACAAGCAGTCAACATCAAG      |
| PMA1 #3 | ORF, +2018<br>ORF, +2290       | CTATTATTGATGCTTTGAAGACCTCCAG<br>TGCCCCAAAATAATAGACATACCCCATAA |
| PMA1 #4 | 3' UTR, +2886<br>3' UTR, +3098 | GATACACTAAAAAGAATTAGGAGCCAAC<br>CAAGAAAGAAAAAGTACCATCCAGAG    |
| PMA1 #5 | 3' UTR, +3287<br>3' UTR, +3500 | GAAAATATTTGGTATCTTTGCAAGATG<br>GTAAATTTGTATACGTTTCATGTAAGTG   |
| PMA1 #6 | 3' UTR, +3448<br>3' UTR, +3662 | GCGCCATACAGACACTCAAGATAC<br>GGCCTGGCGATTTGTTTGCTTTCTTG        |
| PMA1 #7 | 3' UTR, +3619<br>3' UTR, +3905 | CTTCATCACAAGAAAGCAAACAAATCG<br>CGTGATGAGTGAGTTAAGTTCTGCTG     |
| Chr V   | no ORF, Top<br>no ORF, Bottom  | GGCTGTCAGAATATGGGGCCGTAGTA<br>CACCCCGAAGCTGCTTTCACAATAC       |
